# Supplementary material for: Assessment of Fruit and Vegetables Intake with Biomarkers in Children and Adolescents and Their Level of Validation: A Systematic Review
Source: MDPI journal article supplement (doi:10.3390/metabo12020126), 2022-01-28
Supplement: s1 [file s1]

Table S1: The full search strategy on PubMed, the database coverage was 1946 to present and was searched on 15 January 2021.

| Search | Query                                                                                                                                                                                                                                                                                                                                                                                                                                                                                                                                                                                                                                                                                                        | Result    |
|--------|--------------------------------------------------------------------------------------------------------------------------------------------------------------------------------------------------------------------------------------------------------------------------------------------------------------------------------------------------------------------------------------------------------------------------------------------------------------------------------------------------------------------------------------------------------------------------------------------------------------------------------------------------------------------------------------------------------------|-----------|
| 17     | #16 and #10 and #4                                                                                                                                                                                                                                                                                                                                                                                                                                                                                                                                                                                                                                                                                           | 1662      |
| 16     | #12 or #13 or #14 or #15                                                                                                                                                                                                                                                                                                                                                                                                                                                                                                                                                                                                                                                                                     | 4,160,999 |
| 15     | "Adolescent"[Mesh]                                                                                                                                                                                                                                                                                                                                                                                                                                                                                                                                                                                                                                                                                           | 2,061,820 |
| 14     | "Child"[Mesh]                                                                                                                                                                                                                                                                                                                                                                                                                                                                                                                                                                                                                                                                                                | 1,939,644 |
| 13     | "Infant"[Mesh]                                                                                                                                                                                                                                                                                                                                                                                                                                                                                                                                                                                                                                                                                               | 1,154,174 |
| 12     | child[Title/Abstract] OR youth[Title/Abstract] OR juvenile*[Title/Abstract] OR preschool[Title/Abstract] OR boy*[Title/Abstract] OR girl*[Title/Abstract] OR teenage*[Title/Abstract] OR children[Title/Abstract] OR childhood[Title/Abstract] OR adolescence[Title/Abstract] OR infant*[Title/Abstract] OR infancy[Title/Abstract] OR adolescent*[Title/Abstract]                                                                                                                                                                                                                                                                                                                                           | 2,106,366 |
| 10     | #6 or #7 or #8 or #9                                                                                                                                                                                                                                                                                                                                                                                                                                                                                                                                                                                                                                                                                         | 1,108,867 |
| 9      | "Metabolome"[Mesh]                                                                                                                                                                                                                                                                                                                                                                                                                                                                                                                                                                                                                                                                                           | 10,905    |
| 8      | "Metabolomics"[Mesh]                                                                                                                                                                                                                                                                                                                                                                                                                                                                                                                                                                                                                                                                                         | 17,891    |
| 7      | "Biomarkers"[Mesh]                                                                                                                                                                                                                                                                                                                                                                                                                                                                                                                                                                                                                                                                                           | 767,036   |
| 6      | (urine[Title/Abstract] OR urinary[Title/Abstract] OR plasma[Title/Abstract] OR serum*[Title/Abstract] OR excretion*[Title/Abstract] OR blood[Title/Abstract] OR skin[Title/Abstract] OR saliva[Title/Abstract]) AND (biomarker*[Title/Abstract] OR marker*[Title/Abstract] OR metabolite*[Title/Abstract] OR biokinetics[Title/Abstract] OR biotransformation[Title/Abstract] OR bioavailability[Title/Abstract] OR ADME[Title/Abstract])                                                                                                                                                                                                                                                                    | 461,623   |
| 4      | #1 or #2 or #3                                                                                                                                                                                                                                                                                                                                                                                                                                                                                                                                                                                                                                                                                               | 439,554   |
| 3      | "Vegetables"[Mesh]                                                                                                                                                                                                                                                                                                                                                                                                                                                                                                                                                                                                                                                                                           | 31,705    |
| 2      | "Fruit"[Mesh]                                                                                                                                                                                                                                                                                                                                                                                                                                                                                                                                                                                                                                                                                                | 106,704   |
| 1      | fruit*[Title/Abstract] OR vegetable*[Title/Abstract] OR citrus[Title/Abstract] OR berry[Title/Abstract] OR berries[Title/Abstract] OR apple*[Title/Abstract] OR grape*[Title/Abstract] OR pear*[Title/Abstract] OR orange*[Title/Abstract] OR banana*[Title/Abstract] OR mango*[Title/Abstract] OR pineapple*[Title/Abstract] OR tomato*[Title/Abstract] OR potato*[Title/Abstract] OR onion*[Title/Abstract] OR pea*[Title/Abstract] OR leek*[Title/Abstract] OR spinach*[Title/Abstract] OR lettuce*[Title/Abstract] OR endive*[Title/Abstract] OR asparagus*[Title/Abstract] OR kale[Title/Abstract] OR Brassica[Title/Abstract] OR cabbage*[Title/Abstract] OR "cruciferous vegetable*" [Title/Abstract] | 366,806   |

Table S2: The full search strategy on Scopus, the database coverage was 1946 to present and was searched on 15 January 2021.

| Search | Query                                                                                                                                                                                                                                                                                                                                                                                                                                                                                                                                                                                                                                                                                                                                                | result    |
|--------|------------------------------------------------------------------------------------------------------------------------------------------------------------------------------------------------------------------------------------------------------------------------------------------------------------------------------------------------------------------------------------------------------------------------------------------------------------------------------------------------------------------------------------------------------------------------------------------------------------------------------------------------------------------------------------------------------------------------------------------------------|-----------|
| 4      | ( TITLE-ABS ( fruit* OR vegetable* OR citrus OR berry OR berries OR apple* OR grape* OR pear* OR orange* OR banana* OR mango* OR pineapple* OR tomato* OR potato* OR onion* OR pea* OR leek* OR spinach* OR lettuce* OR endive* OR asparagus* OR kale OR brassica OR cabbage* OR "cruciferous vegetable*" ) ) AND ( TITLE-ABS ( ( urine OR urinary OR plasma OR serum* OR excretion* OR blood OR skin OR saliva ) AND ( biomarker* OR marker* OR metabolite* OR biokinetics OR biotransformation OR bioavailability OR adme OR metabolom* ) ) ) AND ( TITLE-ABS ( child OR youth OR juvenile* OR preschool OR boy* OR girl* OR teenage* OR children OR childhood OR adolescence OR infant* OR infancy OR adolescent* ) ) ) AND NOT INDEX ( medline ) | 394       |
| 3      | ( TITLE-ABS ( fruit* OR vegetable* OR citrus OR berry OR berries OR apple* OR grape* OR pear* OR orange* OR banana* OR mango* OR pineapple* OR tomato* OR potato* OR onion* OR pea* OR leek* OR spinach* OR lettuce* OR endive* OR asparagus* OR kale OR brassica OR cabbage* OR "cruciferous vegetable*" ) ) AND ( TITLE-ABS ( ( urine OR urinary OR plasma OR serum* OR excretion* OR blood OR skin OR saliva ) AND ( biomarker* OR marker* OR metabolite* OR biokinetics OR biotransformation OR bioavailability OR adme OR metabolom* ) ) ) AND ( TITLE-ABS ( child OR youth OR juvenile* OR preschool OR boy* OR girl* OR teenage* OR children OR childhood OR adolescence OR infant* OR infancy OR adolescent* ) ) )                           | 2009      |
| 2      | TITLE-ABS ( ( urine OR urinary OR plasma OR serum* OR excretion* OR blood OR skin OR saliva ) AND ( biomarker* OR marker* OR metabolite* OR biokinetics OR biotransformation OR bioavailability OR adme OR metabolom* ) )                                                                                                                                                                                                                                                                                                                                                                                                                                                                                                                            | 525,596   |
| 1      | TITLE-ABS ( fruit* OR vegetable* OR citrus OR berry OR berries OR apple* OR grape* OR pear* OR orange* OR banana* OR mango* OR pineapple* OR tomato* OR potato* OR onion* OR pea* OR leek* OR spinach* OR lettuce* OR endive* OR asparagus* OR kale OR brassica OR cabbage* OR "cruciferous vegetable*" )                                                                                                                                                                                                                                                                                                                                                                                                                                            | 2,547,671 |

Table S3: The full search strategy on Web of Science, the database coverage was 1900 to present and was searched on 15 January 2021.

| research | query                                                                                                                                                                                                                                                                                                                                                                                                                        | result    |
|----------|------------------------------------------------------------------------------------------------------------------------------------------------------------------------------------------------------------------------------------------------------------------------------------------------------------------------------------------------------------------------------------------------------------------------------|-----------|
| 10       | #9 AND #6 AND #3 <i>Indexes=SCI-EXPANDED, SSCI, A&amp;HCI, CPCI-S, CPCI-SSH, BKCI-S, BKCI-SSH, ESCI, CCR-EXPANDED, IC Timespan=All years</i>                                                                                                                                                                                                                                                                                 | 1518      |
| 9        | #7 OR #8 <i>Indexes=SCI-EXPANDED, SSCI, A&amp;HCI, CPCI-S, CPCI-SSH, BKCI-S, BKCI-SSH, ESCI, CCR-EXPANDED, IC Timespan=All years</i>                                                                                                                                                                                                                                                                                         | 2,437,047 |
| 8        | AB=(child OR youth OR juvenile* OR preschool OR boy* OR girl* OR teenage* OR children OR childhood OR adolescence OR infant* OR infancy OR adolescent*) <i>Indexes=SCI-EXPANDED, SSCI, A&amp;HCI, CPCI-S, CPCI-SSH, BKCI-S, BKCI-SSH, ESCI, CCR-EXPANDED, IC Timespan=All years</i>                                                                                                                                          | 1,615,500 |
| 7        | TI=(child OR youth OR juvenile* OR preschool OR boy* OR girl* OR teenage* OR children OR childhood OR adolescence OR infant* OR infancy OR adolescent*) <i>Indexes=SCI-EXPANDED, SSCI, A&amp;HCI, CPCI-S, CPCI-SSH, BKCI-S, BKCI-SSH, ESCI, CCR-EXPANDED, IC Timespan=All years</i>                                                                                                                                          | 1,558,422 |
| 6        | #4 OR #5 <i>Indexes=SCI-EXPANDED, SSCI, A&amp;HCI, CPCI-S, CPCI-SSH, BKCI-S, BKCI-SSH, ESCI, CCR-EXPANDED, IC Timespan=All years</i>                                                                                                                                                                                                                                                                                         | 415,195   |
| 5        | AB=((urine OR urinary OR plasma OR serum* OR excretion* OR blood OR skin OR saliva) and (biomarker* OR marker* OR metabolite* OR biokinetics OR biotransformation OR bioavailability OR ADME OR metabolom*)) <i>Indexes=SCI-EXPANDED, SSCI, A&amp;HCI, CPCI-S, CPCI-SSH, BKCI-S, BKCI-SSH, ESCI, CCR-EXPANDED, IC Timespan=All years</i>                                                                                     | 384,910   |
| 4        | TI=((urine OR urinary OR plasma OR serum* OR excretion* OR blood OR skin OR saliva) and (biomarker* OR marker* OR metabolite* OR biokinetics OR biotransformation OR bioavailability OR ADME OR metabolom*)) <i>Indexes=SCI-EXPANDED, SSCI, A&amp;HCI, CPCI-S, CPCI-SSH, BKCI-S, BKCI-SSH, ESCI, CCR-EXPANDED, IC Timespan=All years</i>                                                                                     | 61,077    |
| 3        | #1 OR #2 <i>Indexes=SCI-EXPANDED, SSCI, A&amp;HCI, CPCI-S, CPCI-SSH, BKCI-S, BKCI-SSH, ESCI, CCR-EXPANDED, IC Timespan=All years</i>                                                                                                                                                                                                                                                                                         | 2,010,997 |
| 2        | TI=(fruit* OR vegetable* OR citrus OR berry OR berries OR apple* OR grape* OR pear* OR orange* OR banana* OR mango* OR pineapple* OR tomato* OR potato* OR onion* OR pea* OR leek* OR spinach* OR lettuce* OR endive* OR asparagus* OR kale OR Brassica OR cabbage* OR "cruciferous vegetable*") <i>Indexes=SCI-EXPANDED, SSCI, A&amp;HCI, CPCI-S, CPCI-SSH, BKCI-S, BKCI-SSH, ESCI, CCR-EXPANDED, IC Timespan=All years</i> | 1,742,315 |
| 1        | AB=(fruit* OR vegetable* OR citrus OR berry OR berries OR apple* OR grape* OR pear* OR orange* OR banana* OR mango* OR pineapple* OR tomato* OR potato* OR onion* OR pea* OR leek* OR spinach* OR lettuce* OR endive* OR asparagus* OR kale OR Brassica OR cabbage* OR "cruciferous vegetable*") <i>Indexes=SCI-EXPANDED, SSCI, A&amp;HCI, CPCI-S, CPCI-SSH, BKCI-S, BKCI-SSH, ESCI, CCR-EXPANDED, IC Timespan=All years</i> | 583,926   |
