# Supplementary material for: Assessment of Fruit and Vegetables Intake with Biomarkers in Children and Adolescents and Their Level of Validation: A Systematic Review
Source: MDPI journal article supplement (doi:10.3390/metabo12020126), 2022-01-28
Supplement: s1 [file s1]

| N  | Question                                                                                                                                                                                                                                                                                                                      | Study quality feature                                     |
|----|-------------------------------------------------------------------------------------------------------------------------------------------------------------------------------------------------------------------------------------------------------------------------------------------------------------------------------|-----------------------------------------------------------|
| 1. | <b><u>Was the research question in this paper clearly stated?</u></b><br>-Biomarker description<br>-Study objectives<br>-Pre-specified hypotheses                                                                                                                                                                             | Hypothesis/Objective<br>(0,1,2,3)                         |
| 2. | <b><u>Was the study design clearly specified and defined?</u></b><br>-Characteristics of the study participants<br>-Inclusion and exclusion criteria                                                                                                                                                                          | Study population selection<br>(0,1,2)                     |
| 3. | <b><u>Was the study population representative of the target/reference population under investigation?</u></b><br>-Sampling frame (study population source)<br>-Participation rate (i.e. eligible persons at least 50%)?<br>-Sample size justification/ power description                                                      | Study population representativeness<br>(0,1,2,3)          |
| 4. | <b><u>Was the study population clearly described?</u></b><br>-Study population characteristics (demographic, clinical and social)<br>-Exposures and potential confounders<br>-Were missing values and strategies to deal with missing data reported                                                                           | Study population characteristics<br>(0,1,2,3)             |
| 5. | <b><u>Were statistical analyses adequately described?</u></b><br>-Statistical test for correlation reported (Spearman/Pearson)<br>-Univariable or multivariable linear regression<br>-Key potential confounding variables measured and adjusted statistically in reported analyses<br>-Significance level tested and reported | Statistical analysis<br>(0,1,2,3)                         |
| 6. | <b><u>Are the results interpreted in the context of the pre-specified hypotheses?</u></b><br>-Interpretation of the results considering results from similar studies<br>-Biological context                                                                                                                                   | Data interpretation<br>(0,1,2)                            |
| 7. | <b><u>Was the biological material and assay methods clearly described?</u></b><br>- Assay methods (preservation and storage, detailed protocol, including specific reagents or kits used)<br>-Quality control procedures                                                                                                      | Specimen characteristics and assay methods<br>(0,1,2,3,4) |

|    |                                                                                                                                                                                                                                                  |                                              |
|----|--------------------------------------------------------------------------------------------------------------------------------------------------------------------------------------------------------------------------------------------------|----------------------------------------------|
|    | -Reproducibility assessments<br>-Quantitation methods and scoring and reporting protocols                                                                                                                                                        |                                              |
| 8. | <b><u>Were the laboratory measurements of the biomarkers clearly reported?</u></b><br>-Laboratory/place of measurement<br>-Blinded analysis                                                                                                      | <b>Laboratory measurement<br/>(0,1,2)</b>    |
| 9. | <b><u>Were biomarkers adequately handled in statistical analysis and in data presentation?</u></b><br>--Biomarker variable distribution<br>-Outlier detection and handling<br>-Possible errors resulting from measurement inaccuracies discussed | <b>Biomarker data modeling<br/>(0,1,2,3)</b> |

**Every positive evaluation grade 1 point**

**Quality Rating: strong (18-25 points), moderate (9-17 Points), or Poor ( $\leq 8$  Points)**
