# Supplementary material for: Assessment of Fruit and Vegetables Intake with Biomarkers in Children and Adolescents and Their Level of Validation: A Systematic Review
Source: Metabolites. 2022 Jan 28;12(2):126. doi: 10.3390/metabo12020126 (PMC8876138; doi:10.3390/metabo12020126)
Supplement: Supplementary file 1 [file metabolites-12-00126-s001.zip › Supplementary File S3 Quality assessment of studies .xlsx]

## Sheet: cross-section
	hypothesis/objective were the research question in this paper clearly stated?			study population were the study design clearly specified and define?		study population representiveness was the study presentative of the target/reference population under investigation?			study population characteristics was the study population clearly described?			statistical analysis were statistical analysese adequately described?			data interpretation are the results interpreted in the context of the pre-specified hypotheses?		specimen characteristic and assay methods were the biological material and assay methods clearly described?				laboratory measuremrnt was the laboratory measurement of the biomarkers clearly reported?		biomarker data modeling were biomarkers adequately handled in statistical analysis and data presentation?
Reference	biomarker description (0 or 1)	study objectives (0 or 1)	pre-specified hypotheses (0 or 1)	characterisctics of the study participates (0 or 1)	inclusion and excusion criteria of the participants (0 or 1)	sample frame (study population source) (0 or 1)	participation rate (i.e. eligibel persons at least 50%) (0 or 1)	sample size justification/power description (0 or 1)	the study population characteristics (i.e. demographics, clinical and social) descriptopn (0 or 1)	stratigies to deal with missing values (0 or 2)	exposures and potential confounders (0 or 1)	univiariable or multivariable linear regression (0 or 1)	statistical test for correlation reported (spearman/pearson) (0 or 1)	key potential confounding variable measured and adjusted statistically in reported (0 or 1)	interpretation of the results considering results from similar studies (0 or 1)	biological context described (0 or 1)	the measurement methods described (assay methods, preservation and storage, detailed protocol, including specific reagents or kits used) (0 or 1)	quantitation methods description (0 or 1)	quality control procedures (0 or 1)	reproducibility assessment (0 or 1)	laboratory/ place of measurement mentioned? (0 or 1)	the analyses blinded for laboratory staff (0 or 1)	distribution of biomarker data reported (if non-normal how it was standardized) (0 or 1)	report on methods or outlier detection and handling (0 or 1)	possible errors resulting from measurement inaccuracies discussed (0 or 1)	Total points (max. 25)	quality level
Byers, Tim, et al. “The Accuracy of Parental Reports of Their Children's Intake of Fruits and Vegetables: Validation of a Food Frequency Questionnaire with Serum Levels of Carotenoids and Vitamins C, A, and E.” Epidemiology, vol. 4, no. 4, 1993, pp. 350–355. JSTOR, www.jstor.org/stable/3702233.	0	1	1	1	0	1	1	1	1	1	1	0	1	1	1	1	1	0	0	0	1	1	1	0	1	18	strong
Graeme Jones, Malcolm D Riley, Susan Whiting, Association between urinary potassium, urinary sodium, current diet, and bone density in prepubertal children, The American Journal of Clinical Nutrition, Volume 73, Issue 4, April 2001, Pages 839–844, https://doi.org/10.1093/ajcn/73.4.839	1	1	1	1	0	1	1	1	1	0	1	1	1	1	1	1	1	0	1	0	0	0	0	0	1	17	moderate
Marian L. Neuhouser, Cheryl L. Rock, Alison L. Eldridge, Alan R. Kristal, Ruth E. Patterson, Dale A. Cooper, Dianne Neumark-Sztainer, Lawrence J. Cheskin, Mark D. Thornquist, Serum Concentrations of Retinol, α-Tocopherol and the Carotenoids Are Influenced by Diet, Race and Obesity in a Sample of Healthy Adolescents, The Journal of Nutrition, Volume 131, Issue 8, August 2001, Pages 2184–2191, http…	1	1	1	1	1	1	1	1	1	1	1	1	1	1	1	1	1	0	1	0	0	0	1	1	1	21	strong
Michael S. Irwig, Ahmed El-Sohemy, Ana Baylin, Nader Rifai, Hannia Campos, Frequent Intake of Tropical Fruits That Are Rich in β-Cryptoxanthin Is Associated with Higher Plasma β-Cryptoxanthin Concentrations in Costa Rican Adolescents, The Journal of Nutrition, Volume 132, Issue 10, October 2002, Pages 3161–3167, https://doi.org/10.1093/jn/131.10.3161	1	1	1	1	1	1	1	1	1	1	1	1	1	1	1	1	1	1	1	0	1	0	1	1	1	23	strong
Sheryl S. Aguilar, Heidi J. Wengreen, Michael Lefevre, Gregory J. Madden, Julie Gast, Skin Carotenoids: A Biomarker of Fruit and Vegetable Intake in Children, Journal of the Academy of Nutrition and Dietetics,Volume 114, Issue 8,2014,Pages 1174-1180,ISSN 2212-2672,https://doi.org/10.1016/j.jand.2014.04.026. (https://www.sciencedirect.com/science/article/pii/S2212267214004936)	1	1	1	1	1	1	0	1	1	0	1	1	0	1	1	1	1	0	1	1	0	0	1	1	1	19	strong
Biltoft-Jensen, A., Bysted, A., Trolle, E., Christensen, T., Knuthsen, P., Damsgaard, C., . . . Tetens, I. (2013). Evaluation of Web-based Dietary Assessment Software for Children: Comparing reported fruit, juice and vegetable intakes with plasma carotenoid concentration and school lunch observations. British Journal of Nutrition, 110(1), 186-195. doi:10.1017/S0007114512004746	1	1	1	1	0	1	0	0	1	0	1	1	1	1	1	1	1	1	0	0	0	0	1	0	1	16	moderate
Burrows, T.L., Warren, J.M., Colyvas, K., Garg, M.L. and Collins, C.E. (2009), Validation of Overweight Children's Fruit and Vegetable Intake Using Plasma Carotenoids. Obesity, 17: 162-168. https://doi.org/10.1038/oby.2008.495	1	1	1	1	1	1	0	0	1	0	1	1	1	1	1	1	1	0	0	0	0	0	0	1	1	16	moderate
Collese, T.S.; De Moraes, A.C.F.; Rendo-Urteaga, T.; Luzia, L.A.; Rondó, P.H.d.C.; Marchioni, D.M.L.; Carvalho, H.B. The Validity of Children’s Fruit and Vegetable Intake Using Plasma Vitamins A, C, and E: The SAYCARE Study. Nutrients 2019, 11, 1815. https://doi.org/10.3390/nu11081815	1	1	1	1	1	1	0	1	1	1	1	1	1	1	1	1	1	0	1	0	1	0	0	1	0	19	strong
Vandevijvere, S., Geelen, A., Gonzalez-Gross, M., Van't Veer, P., Dallongeville, J., Mouratidou, T., . . . Huybrechts, I. (2013). Evaluation of food and nutrient intake assessment using concentration biomarkers in European adolescents from the Healthy Lifestyle in Europe by Nutrition in Adolescence study. British Journal of Nutrition, 109(4), 736-747. doi:10.1017/S0007114512002012	1	1	1	1	1	1	0	1	1	0	1	1	1	1	1	1	1	0	1	0	1	0	0	0	1	18	strong
Iglesia, I., Mouratidou, T., González-Gross, M. et al. Foods contributing to vitamin B6, folate, and vitamin B12 intakes and biomarkers status in European adolescents: The HELENA study. Eur J Nutr 56, 1767–1782 (2017). https://doi.org/10.1007/s00394-016-1221-1	1	1	1	1	1	1	1	1	1	0	1	1	0	1	1	1	1	0	1	0	1	0	1	0	0	18	strong
Danika Krupp, Natalie Doberstein, Lijie Shi, Thomas Remer, Hippuric Acid in 24-Hour Urine Collections Is a Potential Biomarker for Fruit and Vegetable Consumption in Healthy Children and Adolescents, The Journal of Nutrition, Volume 142, Issue 7, July 2012, Pages 1314–1320, https://doi.org/10.3945/jn.112.159319	1	1	1	1	1	1	0	0	1	0	1	1	1	1	1	1	1	0	1	0	0	0	1	0	0	16	moderate
Lau, CH.E., Siskos, A.P., Maitre, L. et al. Determinants of the urinary and serum metabolome in children from six European populations. BMC Med 16, 202 (2018). https://doi.org/10.1186/s12916-018-1190-8	1	1	1	1	0	1	0	0	1	0	1	1	1	1	1	1	1	1	1	1	0	0	1	1	0	18	strong
Masayuki OKUDA, Satoshi SASAKI, Noriko BANDO, Michio HASHIMOTO, Ichiro KUNITSUGU, Shinichi SUGIYAMA, Junji TERAO, Tatsuya HOBARA, Carotenoid, Tocopherol, and Fatty Acid Biomarkers and Dietary Intake Estimated by Using a Brief Self-Administered Diet History Questionnaire for Older Japanese Children and Adolescents, Journal of Nutritional Science and Vitaminology, 2009, https://doi.org/10.3177/jnsv…	1	1	1	1	1	1	0	1	1	0	1	0	1	1	1	1	1	1	0	0	0	0	1	0	0	16	moderate
Penczynski, Katharina J., et al. "Relative validation of 24-h urinary hippuric acid excretion as a biomarker for dietary flavonoid intake from fruit and vegetables in healthy adolescents." European journal of nutrition 56.2 (2017): 757-766.	1	1	1	1	1	1	0	0	1	0	1	1	1	1	1	1	1	0	1	0	1	1	1	0	0	18	strong
Prasad, Marianne, et al. "Carotenoid intake and serum concentration in young Finnish children and their relation with fruit and vegetable consumption." Nutrients 10.10 (2018): 1533.	1	1	1	1	1	1	0	0	1	0	1	1	1	1	1	1	1	0	1	0	0	0	1	0	0	16	moderate
Scarmo, S., et al. "Skin carotenoid status measured by resonance Raman spectroscopy as a biomarker of fruit and vegetable intake in preschool children." European journal of clinical nutrition 66.5 (2012): 555-560.	1	1	1	1	0	1	0	0	1	0	1	1	1	1	1	1	1	1	0	0	0	0	1	0	0	15	moderate
Slater, Betzabeth, et al. "Validation of a food frequency questionnaire to assess the consumption of carotenoids, fruits and vegetables among adolescents: the method of triads." Cadernos de saude publica 26.11 (2010): 2090-2100.	1	1	1	1	1	1	0	1	0	0	1	1	1	1	1	1	1	0	0	0	0	1	1	0	0	16	moderate
Lori M. Nguyen, Rachel E. Scherr, Jessica D. Linnell, Igor V. Ermakov, Werner Gellermann, Lisa Jahns, Carl L. Keen, Sheridan Miyamoto, Francene M. Steinberg, Heather M. Young, Sheri Zidenberg-Cherr,Evaluating the relationship between plasma and skin carotenoids and reported dietary intake in elementary school children to assess fruit and vegetable intake,Archives of Biochemistry and Biophysics,Vo…	1	1	1	1	0	1	0	0	0	0	1	0	1	1	1	1	1	1	0	0	0	0	1	0	0	13	moderate
Elaine Hillesheim, Roseli Borges Donegá Toffano, Tamiris Trevisan de Barros, Roberta Garcia Salomão, Mariana Giaretta Mathias, Carolina de Almeida Coelho-Landell, Maria Olímpia Ribeiro do Vale Almada, Joyce Moraes Camarneiro, José Simon Camelo-Junior, Fábio da Veiga Ued, Esther Campos-Gimenez, Karine Redeuil, Maria Pilar Giner, Francois-Pierre Martin, Ivan Montoliu, Sofia Moco, Jim Kaput & Jacque…	1	1	1	1	1	1	1	1	1	0	1	0	1	1	1	1	1	0	0	0	0	0	1	0	1	17	moderate
Hillesheim E, Toffano R B D, Barros T T, et al. Biomarker-based validity of a food frequency questionnaire estimating intake in Brazilian children and adolescents[J]. International Journal of Food Sciences and Nutrition, 2021, 72(2): 236-247.	0	1	1	1	1	1	1	1	1	0	1	1	0	1	1	1	1	0	0	0	0	0	1	0	0	15
Martinelli S, Acciai F, Tasevska N, et al. Using the Veggie Meter in Elementary Schools to Objectively Measure Fruit and Vegetable Intake: A Pilot Study[J]. Methods and Protocols, 2021, 4(2): 33.	1	1	1	1	1	1	1	1	1	1	1	1	1	1	1	1	1	1	0	0	0	0	1	1	0	20
Notario-Barandiaran L, Navarrete-Muñoz E M, Valera-Gran D, et al. Biochemical Validation of a Self-Administered Food Frequency Questionnaire to Assess Diet Using Carotenoids and Vitamins E and D in Male Adolescents in Spain[J]. Antioxidants, 2021, 10(5): 750.	1	1	1	1	1	1	1	1	1	0	1	0	1	1	1	1	1	0	0	0	1	0	1	0	0	17
Seguin-Fowler R A, Hanson K L, Marshall G A, et al. Fruit and Vegetable Intake Assessed by Repeat 24 h Recalls, but Not by A Dietary Screener, Is Associated with Skin Carotenoid Measurements in Children[J]. Nutrients, 2021, 13(3): 980.	1	1	1	1	1	1	1	1	1	1	1	1	0	1	1	1	1	0	1	0	0	0	1	1	1	20
																										17.4783

## Sheet: intervention
Reference	selection bias	study design	confounders	blinding	data collection methods	withdraw and dropouts	global rating	quality level
LALA, VINOD R., and Vinodini Reddy. "Absorption of β-carotene from green leafy vegetables in undernourished children." The American journal of clinical nutrition 23.1 (1970): 110-113.	3	2	2	2	1	2	2	moderate
Vuong, Le T., Stephen R. Dueker, and Suzanne P. Murphy. "Plasma β-carotene and retinol concentrations of children increase after a 30-d supplementation with the fruit Momordica cochinchinensis (gac)." The American journal of clinical nutrition 75.5 (2002): 872-879.	2	1	2	1	1	2	1	strong
ANNAPURNA, Vure, et al. "Bioavailability of spirulina carotenes in preschool children." Journal of Clinical Biochemistry and Nutrition 10.2 (1991): 145-151.	3	2	3	2	1	1	3	weak
Black, A., Vally, H., Morris, P., Daniel, M., Esterman, A., Karschimkus, C., & O'Dea, K. (2013). Nutritional impacts of a fruit and vegetable subsidy programme for disadvantaged Australian Aboriginal children. British Journal of Nutrition, 110(12), 2309-2317. doi:10.1017/S0007114513001700	2	2	3	2	1	1	2	moderate
De Pee, S., et al. "Orange fruit is more effective than are dark-green, leafy vegetables in increasing serum concentrations of retinol and beta-carotene in schoolchildren in Indonesia." The American journal of clinical nutrition 68.5 (1998): 1058-1067.	1	1	2	1	1	1	1	strong
Nawiri, Mildred P., Hudson Nyambaka, and Jane I. Murungi. "Sun-dried cowpeas and amaranth leaves recipe improves β-carotene and retinol levels in serum and hemoglobin concentration among preschool children." European journal of nutrition 52.2 (2013): 583-589.	2	2	3	2	1	1	2	moderate
Whiteside-Mansell, Leanne, Taren Swindle, and Karen Davenport. "Evaluation of “Together, We Inspire Smart Eating”(WISE) nutrition intervention for young children: assessment of fruit and vegetable consumption with parent reports and measurements of skin carotenoids as biomarkers." Journal of hunger & environmental nutrition 16.2 (2021): 235-245.	2	2	3	2	1	2	2	moderate
Barfoot K L, Istas G, Feliciano R P, et al. Effects of daily consumption of wild blueberry on cognition and urinary metabolites in school-aged children: a pilot study[J]. European Journal of Nutrition, 2021: 1-16.	2	1	2	3	2	1	2	moderate
strong =1, moderate=2, weak=3; global rating: 1 strong (no weak rating), 2 moderate (one weak rating), 3 weak (two or more weak ratings)
